# Supplementary material
Source: PubMed Central journal article supplement (PMC3494967)
Supplement: 1213295109_pnas.201213295SI.pdf [file 1213295109_pnas.201213295SI.pdf]

# Supporting Information

Jasion et al. 10.1073/pnas.1213295109

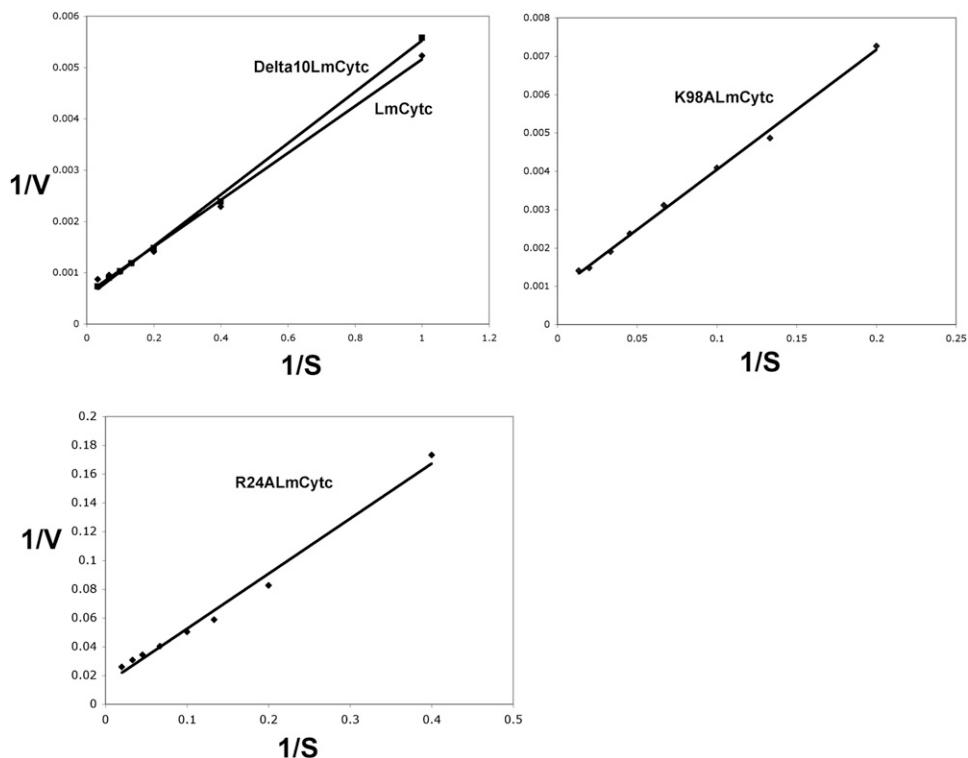

Fig. S1. Lineweaver-Burk plots for wild-type and mutant LmCyts.

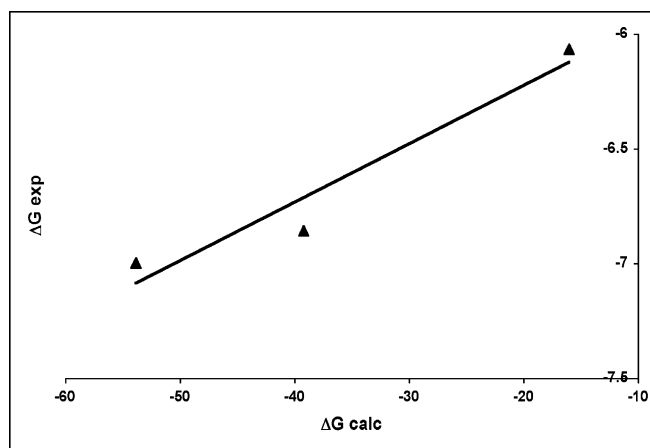

Fig. S2. The experimental  $\Delta G$  (in kilocalories per mole) of forming the LmP-LmCytc complex was estimated by assuming  $K_M = K_D$  and then using  $\Delta G = -RT \ln(1/K_D)$ . The computed  $\Delta G$  was obtained using the MM-PBSA procedure described in the text. The computed  $\Delta G$  does not include entropy, which is why the computed and calculated values are not on the same scale. We have used this procedure quite successfully in matching experimental and computed free energies for inhibitors of nitric oxide synthase, which works well for inhibitors of similar size and number of rotatable bonds. Thus, the errors introduced by ignoring the entropy term is negligible (1, 2).

1. Delker SL, et al. (2010) Unexpected binding modes of nitric oxide synthase inhibitors effective in the prevention of a cerebral palsy phenotype in an animal model. *J Am Chem Soc* 132(15):5437-5442.
2. Xue F, et al. (2010) Potent, highly selective, and orally bioavailable gem-difluorinated monocationic inhibitors of neuronal nitric oxide synthase. *J Am Chem Soc* 132(40):14229-14238.

**Table S1. Crystallographic data collection and refinement statistics**

|                                              | Data set                                               |                                                        |
|----------------------------------------------|--------------------------------------------------------|--------------------------------------------------------|
|                                              | LmP-Δ10LmCytC SAD                                      | LmP-Δ10LmCytC HiRes                                    |
| Space group                                  | P4 <sub>2</sub> 2 <sub>1</sub> 2                       | P4 <sub>2</sub> 2 <sub>1</sub> 2                       |
| Unit cell dimensions, Å                      | <i>a</i> = 149.42, <i>b</i> = 149.42, <i>c</i> = 36.40 | <i>a</i> = 149.74, <i>b</i> = 149.74, <i>c</i> = 36.42 |
| Resolution range, Å                          | 37.3–2.29                                              | 37.4–1.83                                              |
| Radiation source                             | SSRL 12.2                                              | SSRL 12.2                                              |
| Wavelength, Å                                | 1.73                                                   | 0.97                                                   |
| Total observations                           | 258,590                                                | 365,858                                                |
| Unique reflections (highest shell)           | 19,056 (2,724)                                         | 36,729 (5,063)                                         |
| Completeness, % (highest shell)              | 100.0 (100.0)                                          | 99.2 (95.8)                                            |
| * <i>R</i> <sub>p.i.m.</sub> (highest shell) | 0.031 (0.466)                                          | 0.033 (1.411)                                          |
| Redundancy                                   | 7.3 (6.9)                                              | 10.0 (10.1)                                            |
| <I/σ> (highest shell)                        | 17.8 (1.7)                                             | 12.4 (0.6)                                             |
| Wilson B factor                              | 54.5                                                   | 42.3                                                   |
| Reflections used in refinement               | 18,965                                                 | 35,729                                                 |
| Resolution range (Å) in refinement           | 23.31–2.30                                             | 31.99–1.84                                             |
| * <i>R</i> <sub>work</sub>                   | 0.188                                                  | 0.185                                                  |
| * <i>R</i> <sub>free</sub>                   | 0.216                                                  | 0.197                                                  |
| rmsd <sub>angles</sub>                       | 0.95                                                   | 0.91                                                   |
| rmsd <sub>bonds</sub>                        | 0.009                                                  | 0.008                                                  |

\**R*<sub>p.i.m.</sub> is the precision-indicating *R* factor, which is related to the traditional *R*<sub>merge</sub> (*R*<sub>sym</sub>) but provides a better estimate of data quality. See refs. 1 and 2.

<sup>†</sup>*R* factor =  $\sum ||F_o| - |F_c|| / \sum |F_o|$ , where *F*<sub>o</sub> and *F*<sub>c</sub> are the observed and calculated structure factors, respectively.

<sup>‡</sup>*R*<sub>free</sub> was calculated with the 5% of reflections set aside randomly throughout the refinement. The values in parentheses were obtained in the outermost resolution shell.

1. Diederichs K, Karplus PA (1997) Improved R-factors for diffraction data analysis in macromolecular crystallography. *Nat Struct Biol* 4:269–275.
2. Weiss MS (2001) Global indicators of X-ray data quality. *J Appl Crystallogr* 34:130–135.
